# Supplementary material
Source: PubMed Central journal article supplement (PMC117549)
Supplement: pnas_99_1_263__1.pdf [file pnas_99_1_263__1.pdf]

Supporting information for Sekercioglu *et al.* (2002) *Proc. Natl. Acad. Sci. USA* **99** (1), 263–267. (10.1073/pnas.012616199)

**Table 2. List of birds captured with mist nets during the study**

| Family and Latin name             | English name               | For1 | For2 | For3 | Frag1 | Frag2 | Frag3 |
|-----------------------------------|----------------------------|------|------|------|-------|-------|-------|
| Falconidae                        |                            |      |      |      |       |       |       |
| <i>Micrastur ruficollis</i>       | Barred Forest-falcon       | 1    |      |      |       | 1     |       |
| Odontophoridae                    |                            |      |      |      |       |       |       |
| <i>Odontophorus guttatus</i>      | Spotted Wood-quail         |      | 1    |      |       |       |       |
| Columbidae                        |                            |      |      |      |       |       |       |
| <i>Columbina talpacoti</i>        | Ruddy Ground-dove          |      |      | 1    |       |       |       |
| <i>Leptotila verreauxi</i>        | White-tipped Dove          |      |      |      | 1     |       | 2     |
| <i>Leptotila cassini</i>          | Gray-chested Dove          | 3    | 1    | 3    | 6     | 1     | 3     |
| <i>Geotrygon chiriquensis</i>     | Chiriqui Quail-dove        |      |      |      |       |       | 1     |
| <i>Geotrygon montana</i>          | Ruddy Quail-dove           |      | 1    | 1    | 1     |       |       |
| Psittacidae                       |                            |      |      |      |       |       |       |
| <i>Pionus senilis</i>             | White-crowned Parrot       |      |      |      |       | 1     |       |
| Strigidae                         |                            |      |      |      |       |       |       |
| <i>Pulsatrix perspicillata</i>    | Spectacled Owl             |      |      |      | 1     |       |       |
| Trochilidae                       |                            |      |      |      |       |       |       |
| <i>Eutoxeres aquila</i>           | White-tipped Sicklebill    | 5    | 6    | 11   | 7     | 4     | 7     |
| <i>Glaucis aenea</i>              | Bronzy Hermit              | 1    |      |      |       |       |       |
| <i>Phaethornis guy</i>            | Green Hermit               | 58   | 24   | 24   | 28    | 11    | 23    |
| <i>Phaethornis striigularis</i>   | Stripe-throated Hermit     | 9    | 14   | 7    | 7     | 1     | 5     |
| <i>Phaechroa cuvierii</i>         | Scaly-breasted Hummingbird |      | 1    | 1    | 1     | 2     | 1     |
| <i>Campylopterus hemileucurus</i> | Violet Sabrewing           | 5    | 3    | 9    |       |       | 1     |
| <i>Florisuga mellivora</i>        | White-necked Jacobin       |      |      |      |       |       | 1     |
| <i>Chlorostilbon canivetii</i>    | Canivet's Emerald          | 1    |      |      | 1     |       |       |
| <i>Elvira chionura</i>            | White-tailed Emerald       | 3    | 2    | 12   | 2     | 5     | 3     |
| <i>Thalurania colombica</i>       | Violet-crowned Woodnymph   | 6    | 3    | 4    |       | 3     | 2     |
| <i>Amazilia tzacatl</i>           | Rufous-tailed Hummingbird  | 4    | 4    | 15   | 16    | 14    | 24    |
| <i>Polyerata amabilis</i>         | Charming Hummingbird       | 5    | 3    | 8    | 3     | 1     | 5     |
| <i>Saucerottia edward</i>         | Snowy-bellied Hummingbird  |      | 2    | 7    | 3     |       | 1     |
| <i>Heliodaxa jacula</i>           | Green-crowned Brilliant    |      |      | 4    |       |       |       |
| <i>Heliothyx barroti</i>          | Purple-crowned Fairy       |      | 1    |      |       |       |       |
| Trogonidae                        |                            |      |      |      |       |       |       |
| <i>Trogon collaris</i>            | Collared Trogon            |      |      | 2    |       |       |       |
| Momotidae                         |                            |      |      |      |       |       |       |
| <i>Momotus momota</i>             | Blue-crowned Motmot        |      |      | 2    | 2     | 1     | 2     |
| Galbulidae                        |                            |      |      |      |       |       |       |
| <i>Galbula ruficauda</i>          | Rufous-tailed Jacamar      |      | 1    | 2    |       |       |       |
| Ramphastidae                      |                            |      |      |      |       |       |       |
| <i>Aulacorhynchus prasinus</i>    | Emerald Toucanet           |      |      | 1    |       |       |       |
| <i>Pteroglossus frantzii</i>      | Fiery-billed Aracari       |      |      |      |       | 3     | 1     |
| Picidae                           |                            |      |      |      |       |       |       |
| <i>Veniliornis fumigatus</i>      | Smoky-brown Woodpecker     |      |      |      | 4     | 1     |       |
| Furnariidae                       |                            |      |      |      |       |       |       |
| <i>Synallaxis brachyura</i>       | Slaty Spinetail            |      |      | 1    |       |       |       |
| <i>Premnoplex brunnescens</i>     | Spotted Barbtail           |      |      | 4    |       |       |       |

| Family and Latin name              | English name                  | For1 | For2 | For3 | Frag1 | Frag2 | Frag3 |
|------------------------------------|-------------------------------|------|------|------|-------|-------|-------|
| <i>Xenops minutus</i>              | Plain Xenops                  | 1    | 2    | 2    | 1     | 1     | 2     |
| <i>Xenops rutilans</i>             | Streaked Xenops               |      |      | 1    |       |       |       |
| <i>Hyloctistes subulatus</i>       | Striped Woodhaunter           | 1    |      |      |       |       |       |
| <i>Automolus ochrolaemus</i>       | Buff-throated Foliage-gleaner | 5    | 8    | 11   | 4     | 6     | 10    |
| <i>Automolus rubiginosus</i>       | Ruddy Foliage-gleaner         | 8    | 8    | 14   |       | 2     | 11    |
| <i>Sclerurus mexicanus</i>         | Tawny-throated Leaftosser     |      | 1    |      |       |       |       |
| <i>Sclerurus guatemalensis</i>     | Scaly-throated Leaftosser     | 3    |      | 1    |       |       |       |
| Dendrocolaptidae                   |                               |      |      |      |       |       |       |
| <i>Dendrocincla anabatina</i>      | Tawny-winged Woodcreeper      | 2    | 3    |      |       |       |       |
| <i>Dendrocincla homochroa</i>      | Ruddy Woodcreeper             | 5    | 2    | 3    |       |       |       |
| <i>Sittasomus griseicapillus</i>   | Olivaceous Woodcreeper        | 2    |      | 9    | 2     | 6     | 4     |
| <i>Glyphorhynchus spirurus</i>     | Wedge-billed Woodcreeper      | 5    | 6    | 7    | 11    | 9     | 2     |
| <i>Xiphorhynchus erythropygius</i> | Spotted Woodcreeper           | 1    | 1    | 4    |       |       | 1     |
| <i>Lepidocolaptes souleyetii</i>   | Streak-headed Woodcreeper     |      |      |      |       |       | 1     |
| <i>Campylorhamphus pusillus</i>    | Brown-billed Scythebill       | 2    | 1    | 2    | 3     |       |       |
| Thamnophilidae                     |                               |      |      |      |       |       |       |
| <i>Dysithamnus mentalis</i>        | Plain Antvireo                | 5    | 12   | 3    |       |       | 6     |
| <i>Myrmotherula schisticolor</i>   | Slaty Antwren                 | 3    | 7    | 5    | 1     | 4     | 6     |
| <i>Microrhoppias quixensis</i>     | Dot-winged Antwren            |      |      | 1    |       |       |       |
| <i>Cercomacra tyrannina</i>        | Dusky Antbird                 | 2    |      | 1    | 1     | 1     |       |
| <i>Gymnopityhs leucaspis</i>       | Bicolored Antbird             | 8    | 4    | 3    |       |       |       |
| Formicariidae                      |                               |      |      |      |       |       |       |
| <i>Formicarius analis</i>          | Black-faced Antthrush         | 12   | 4    | 4    |       |       |       |
| <i>Grallaria guatimalensis</i>     | Scaled Antpitta               | 1    |      |      |       |       |       |
| Cotingidae                         |                               |      |      |      |       |       |       |
| <i>Cotinga ridgwayi</i>            | Turquoise Cotinga             |      |      |      |       | 1     |       |
| Pipridae                           |                               |      |      |      |       |       |       |
| <i>Manacus aurantiacus</i>         | Orange-collared Manakin       | 2    | 1    |      | 1     |       | 7     |
| <i>Corapipo altera</i>             | White-ruffed Manakin          | 35   | 20   | 70   | 21    | 35    | 117   |
| <i>Pipra coronata</i>              | Blue-crowned Manakin          | 21   | 11   | 24   | 7     | 3     | 17    |
| Tyrannidae                         |                               |      |      |      |       |       |       |
| <i>Mionectes oleagineus</i>        | Ochre-bellied Flycatcher      | 14   | 13   | 11   | 17    | 11    | 40    |
| <i>Mionectes olivaceus</i>         | Olive-striped Flycatcher      |      |      | 6    |       |       |       |
| <i>Leptopogon superciliaris</i>    | Slaty-capped Flycatcher       | 1    |      | 4    |       |       | 2     |
| <i>Zimmerius vilissimus</i>        | Paltry Tyrannulet             |      |      | 1    | 2     |       | 1     |
| <i>Lophotriccus pileatus</i>       | Scale-crested Pygmy-tyrant    | 3    |      | 2    | 1     |       | 1     |
| <i>Rhynchocyclus brevirostris</i>  | Eye-ringed Flatbill           | 1    |      | 1    | 4     | 3     | 4     |
| <i>Platyrinchus coronatus</i>      | Golden-crowned Spadebill      | 1    | 1    | 1    |       |       |       |
| <i>Platyrinchus mystaceus</i>      | White-throated Spadebill      | 5    | 4    | 8    | 2     | 1     | 4     |
| <i>Myiobius sulphureipygius</i>    | Sulphur-rumped Flycatcher     | 3    | 7    | 5    |       | 3     | 15    |
| <i>Empidonax traillii</i>          | Willow Flycatcher             |      |      |      | 1     |       |       |
| <i>Attila spadiceus</i>            | Bright-rumped Attila          |      | 1    | 1    |       |       | 1     |
| <i>Myiarchus tuberculifer</i>      | Dusky-capped Flycatcher       |      |      |      | 2     |       |       |
| <i>Pachyramphus polychopterus</i>  | White-winged Becard           |      |      |      |       | 1     | 4     |
| <i>Schiffornis turdinus</i>        | Thrush-like Schiffornis       |      | 3    |      |       |       |       |
| Troglodytidae                      |                               |      |      |      |       |       |       |
| <i>Thryothorus rutilus</i>         | Rufous-breasted Wren          | 1    |      |      | 2     |       | 1     |
| <i>Thryothorus semibadius</i>      | Riverside Wren                | 2    | 3    | 1    |       |       |       |
| <i>Troglodytes aedon</i>           | House Wren                    |      |      |      | 1     | 1     |       |

| Family and Latin name            | English name                     | For1 | For2 | For3 | Frag1 | Frag2 | Frag3 |
|----------------------------------|----------------------------------|------|------|------|-------|-------|-------|
| <i>Henicorhina leucosticta</i>   | White-breasted Wood-wren         | 37   | 38   | 30   | 11    | 8     | 22    |
| <i>Henicorhina leucophrys</i>    | Gray-breasted Wood-wren          | 1    |      |      |       |       | 3     |
| <i>Microcerculus marginatus</i>  | Scaly-breasted Wren              | 4    | 5    | 2    |       |       | 6     |
| Turdidae                         |                                  |      |      |      |       |       |       |
| <i>Myadestes melanops</i>        | Black-faced Solitaire            |      |      | 1    |       |       | 1     |
| <i>Catharus aurantiirostris</i>  | Orange-billed Nightingale-thrush | 18   | 24   | 12   | 28    | 27    | 22    |
| <i>Turdus grayi</i>              | Clay-colored Robin               | 3    | 1    | 13   | 8     | 7     | 12    |
| <i>Turdus assimilis</i>          | White-throated Thrush            | 5    | 6    | 2    | 3     | 2     | 5     |
| Poliophtilidae                   |                                  |      |      |      |       |       |       |
| <i>Ramphocaenus melanurus</i>    | Long-billed Gnatwren             | 4    | 1    |      |       |       | 2     |
| Vireonidae                       |                                  |      |      |      |       |       |       |
| <i>Hylophilus ochraceiceps</i>   | Tawny-crowned Greenlet           | 1    |      |      |       |       |       |
| Parulidae                        |                                  |      |      |      |       |       |       |
| <i>Parula pitiayumi</i>          | Tropical Parula                  |      |      | 1    |       |       |       |
| <i>Seiurus noveboracensis</i>    | Northern Waterthrush             |      |      | 4    |       |       |       |
| <i>Seiurus motacilla</i>         | Louisiana Waterthrush            |      |      | 2    |       |       |       |
| <i>Myioborus miniatus</i>        | Slate-throated Redstart          | 5    | 4    | 18   | 9     | 1     | 3     |
| <i>Basileuterus culicivorus</i>  | Golden-crowned Warbler           |      | 1    |      |       |       |       |
| <i>Basileuterus rufifrons</i>    | Rufous-capped Warbler            | 1    |      |      | 8     | 5     | 1     |
| <i>Basileuterus fulvicauda</i>   | Buff-rumped Warbler              | 5    | 7    | 4    | 1     | 1     | 2     |
| Coerebidae                       |                                  |      |      |      |       |       |       |
| <i>Coereba flaveola</i>          | Bananaquit                       | 7    |      | 1    | 2     |       | 7     |
| Thraupidae                       |                                  |      |      |      |       |       |       |
| <i>Eucometis penicillata</i>     | Gray-headed Tanager              | 6    | 1    | 5    | 13    | 1     | 5     |
| <i>Habia rubica</i>              | Red-crowned Ant-tanager          | 3    | 5    | 1    |       | 1     | 12    |
| <i>Ramphocelus costaricensis</i> | Cherrie's Tanager                |      |      |      | 5     |       | 1     |
| <i>Thraupis episcopus</i>        | Blue-gray Tanager                |      |      |      | 5     |       |       |
| <i>Euphonia luteicapilla</i>     | Yellow-crowned Euphonia          |      |      |      | 1     | 2     |       |
| <i>Euphonia laniirostris</i>     | Thick-billed Euphonia            | 2    | 1    |      |       |       | 1     |
| <i>Euphonia elegantissima</i>    | Elegant Euphonia                 |      | 3    |      |       |       |       |
| <i>Euphonia imitans</i>          | Spot-crowned Euphonia            | 1    |      |      |       |       | 2     |
| <i>Tangara icterocephala</i>     | Silver-throated Tanager          |      | 2    | 13   | 17    | 10    | 2     |
| <i>Tangara guttata</i>           | Speckled Tanager                 |      |      | 1    | 1     |       |       |
| <i>Tangara gyrola</i>            | Bay-headed Tanager               |      |      | 2    | 2     |       |       |
| <i>Dacnis venusta</i>            | Scarlet-thighed Dacnis           |      |      | 1    |       |       |       |
| Emberizidae                      |                                  |      |      |      |       |       |       |
| <i>Volatinia jacarina</i>        | Blue-black Grassquit             |      | 1    |      |       |       |       |
| <i>Sporophila corvina</i>        | Variable Seedeater               | 6    | 3    | 1    | 7     | 2     | 13    |
| <i>Sporophila corvina</i>        | Yellow-bellied Seedeater         |      |      |      |       |       | 1     |
| <i>Oryzoborus funereus</i>       | Thick-billed Seed-finch          |      |      |      |       | 1     | 6     |
| <i>Tiaris olivacea</i>           | Yellow-faced Grassquit           | 2    |      | 2    | 2     |       | 1     |
| <i>Atlapetes albinucha</i>       | White-naped Brush-finch          |      |      |      | 2     |       |       |
| <i>Buarremon brunneinucha</i>    | Chesnut-capped Brush-finch       | 1    | 1    | 5    | 7     | 3     |       |
| <i>Buarremon torquatus</i>       | Stripe-headed Brush finch        | 2    |      | 1    | 11    | 1     | 7     |
| <i>Arremon aurantiirostris</i>   | Orange-billed Sparrow            | 29   | 21   | 12   | 7     | 12    | 30    |
| <i>Zonotrichia capensis</i>      | Rufous-collared Sparrow          |      |      |      |       | 1     |       |
| Cardinalidae                     |                                  |      |      |      |       |       |       |
| <i>Saltator striatipectus</i>    | Streaked Saltator                |      |      |      | 5     |       | 3     |
| <i>Saltator maximus</i>          | Buff-throated Saltator           | 3    | 1    | 1    | 15    | 7     | 7     |
| <i>Cyanocopsa cyanooides</i>     | Blue-black Grosbeak              | 8    | 11   | 5    | 2     | 1     | 11    |

| <b>Family and Latin name</b> | <b>English name</b> | <b>For1</b> | <b>For2</b> | <b>For3</b> | <b>Frag1</b> | <b>Frag2</b> | <b>Frag3</b> |
|------------------------------|---------------------|-------------|-------------|-------------|--------------|--------------|--------------|
| Total                        |                     | 410         | 327         | 465         | 339          | 230          | 527          |

For1, For2, and For3 are the transects in the Las Cruces Forest, and Frag1, Frag2, and Frag3 are the transects in the small forest fragments. The taxonomy is based on ref.

21.
