# Supplementary material
Source: PubMed Central journal article supplement (PMC117549)
Supplement: pnas_99_1_263__2.pdf [file pnas_99_1_263__2.pdf]

Supporting information for Sekercioglu *et al.* (2002) *Proc. Natl. Acad. Sci. USA* **99** (1), 263–267. (10.1073/pnas.012616199)

**Table 3. Fourteen understory insectivorous species from which we obtained at least four diet samples in each treatment**

| Species                          | Forest-dependence |
|----------------------------------|-------------------|
| <i>Sittasomus griseicapillus</i> | Intermediate      |
| <i>Glyphorhynchus spirurus</i>   | Intermediate      |
| <i>Automolus ochrolaemus</i>     | Intermediate      |
| <i>Automolus rubiginosus</i>     | High              |
| <i>Dysithamnus mentalis</i>      | High              |
| <i>Myrmotherula schisticolor</i> | High              |
| <i>Myiobius sulphureipygius</i>  | High              |
| <i>Henichorhina leucosticta</i>  | High              |
| <i>Microcerculus luscini</i>     | High              |
| <i>Myioborus miniatus</i>        | Intermediate      |
| <i>Phaeothlypis fulvicauda</i>   | Low               |
| <i>Habia rubica</i>              | High              |
| <i>Eucometis penicillata</i>     | High              |
| <i>Atlatpes atricapillus</i>     | Intermediate      |
